# Supplementary material
Source: PubMed Central journal article supplement (PMC6402963)

# *Oxyphor 2P*: A High-Performance Probe for Deep-Tissue Longitudinal Oxygen Imaging

## METHODS S1

### **NMR and MALDI-TOF spectra**

Related to STAR Methods

Tatiana V. Esipova,<sup>1,5</sup> Matthew J. P. Barrett,<sup>3,5</sup> Eva Erlebach,<sup>3</sup> Artëm E. Masunov,<sup>4</sup> Bruno Weber\*<sup>3</sup> and  
Sergei A. Vinogradov\*<sup>1,2,6</sup>

<sup>1</sup> Department of Biochemistry and Biophysics, Perelman School of Medicine, University of Pennsylvania, Philadelphia, PA 19104, USA.

<sup>2</sup> Department of Chemistry, School of Arts and Sciences, University of Pennsylvania, Philadelphia, PA 19104, USA.

<sup>3</sup> Institute of Pharmacology and Toxicology, University of Zurich, and Neuroscience Center Zurich, Zurich CH-8057, Switzerland.

<sup>4</sup> NanoScience Technology Center, Department of Chemistry and School of Modeling, Simulation and Training, University of Central Florida, Orlando, FL 32826, USA; National Research Nuclear University MEPhI, Kashirskoye Shosse 31, Moscow 115409, Russia; South Ural State University, Lenin Pr. 76, Chelyabinsk 454080, Russia.

<sup>5</sup> These authors contributed equally to this work.

<sup>6</sup> Lead contact.

Correspondence: [vinograd.upenn@gmail.com](mailto:vinograd.upenn@gmail.com), [bweber@pharma.uzh.ch](mailto:bweber@pharma.uzh.ch)

# 1: <sup>1</sup>H NMR

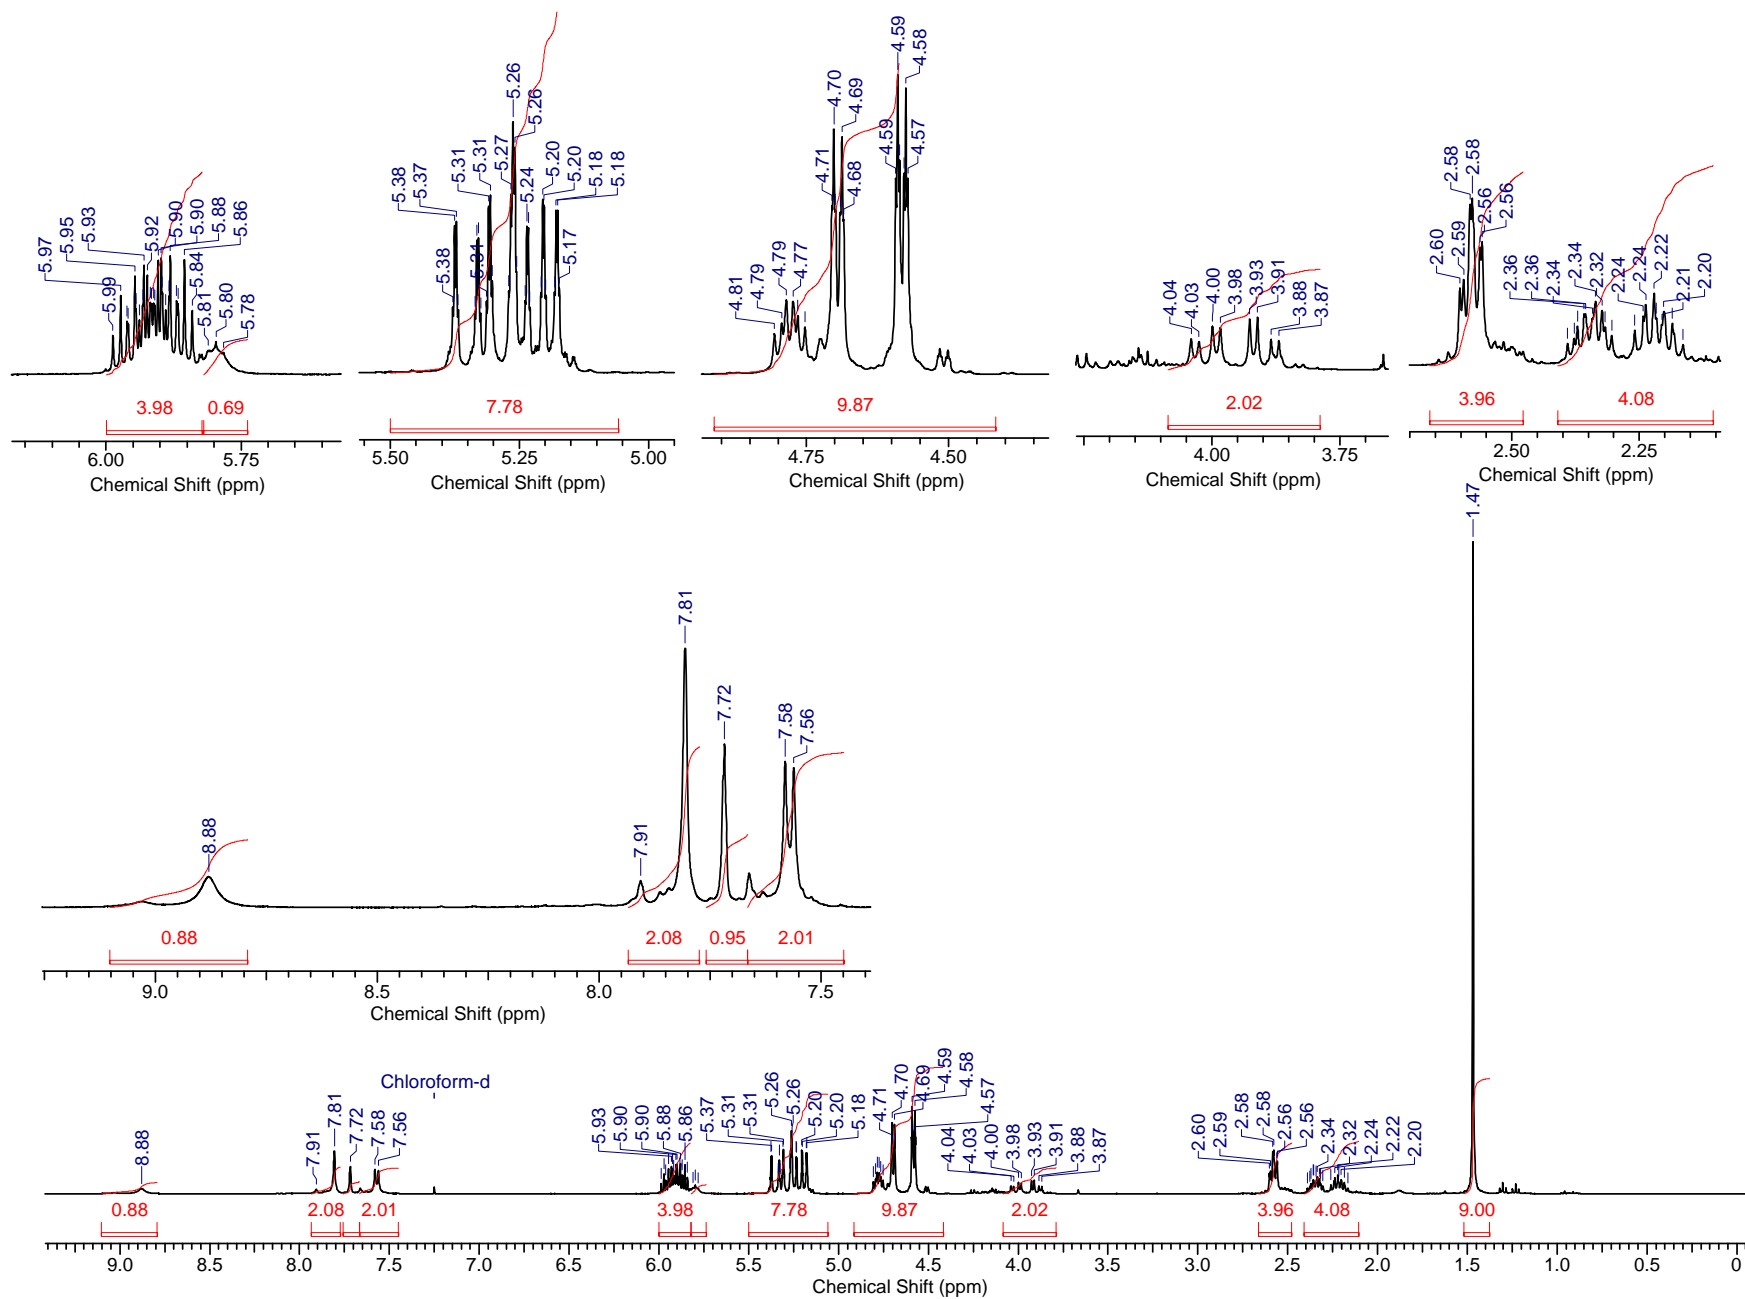



## 2: $^{13}\text{C}$ NMR

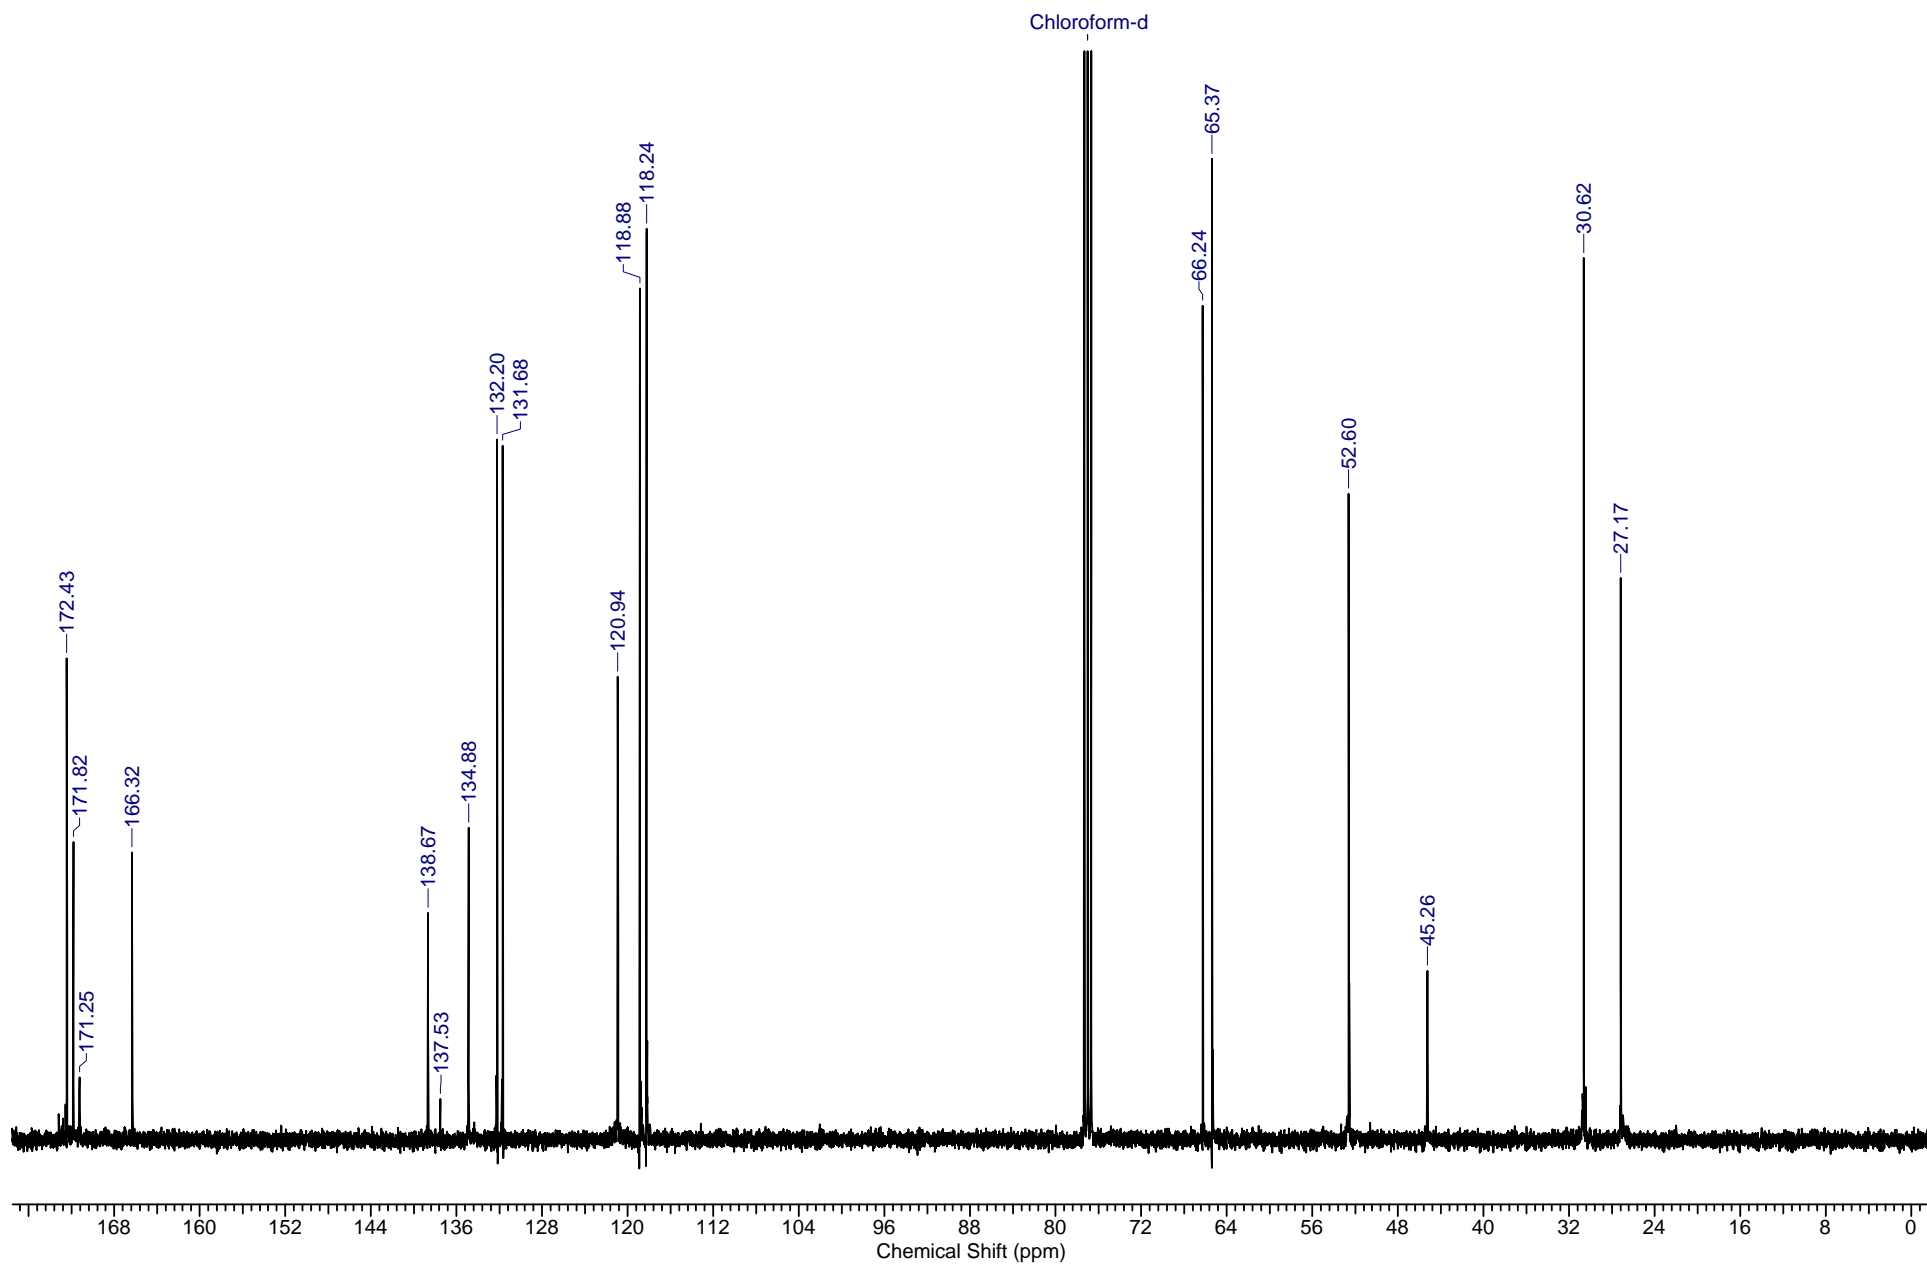

### 3: $^1\text{H}$ NMR

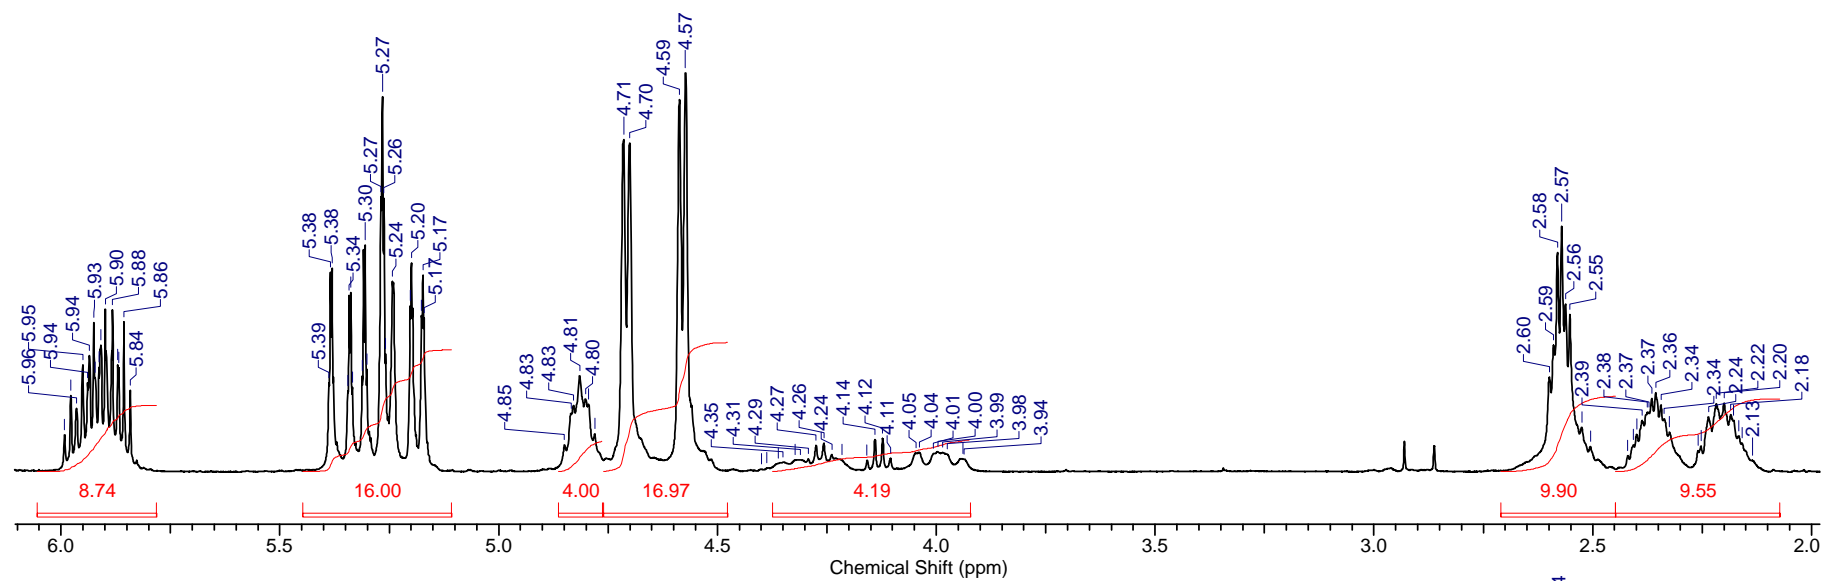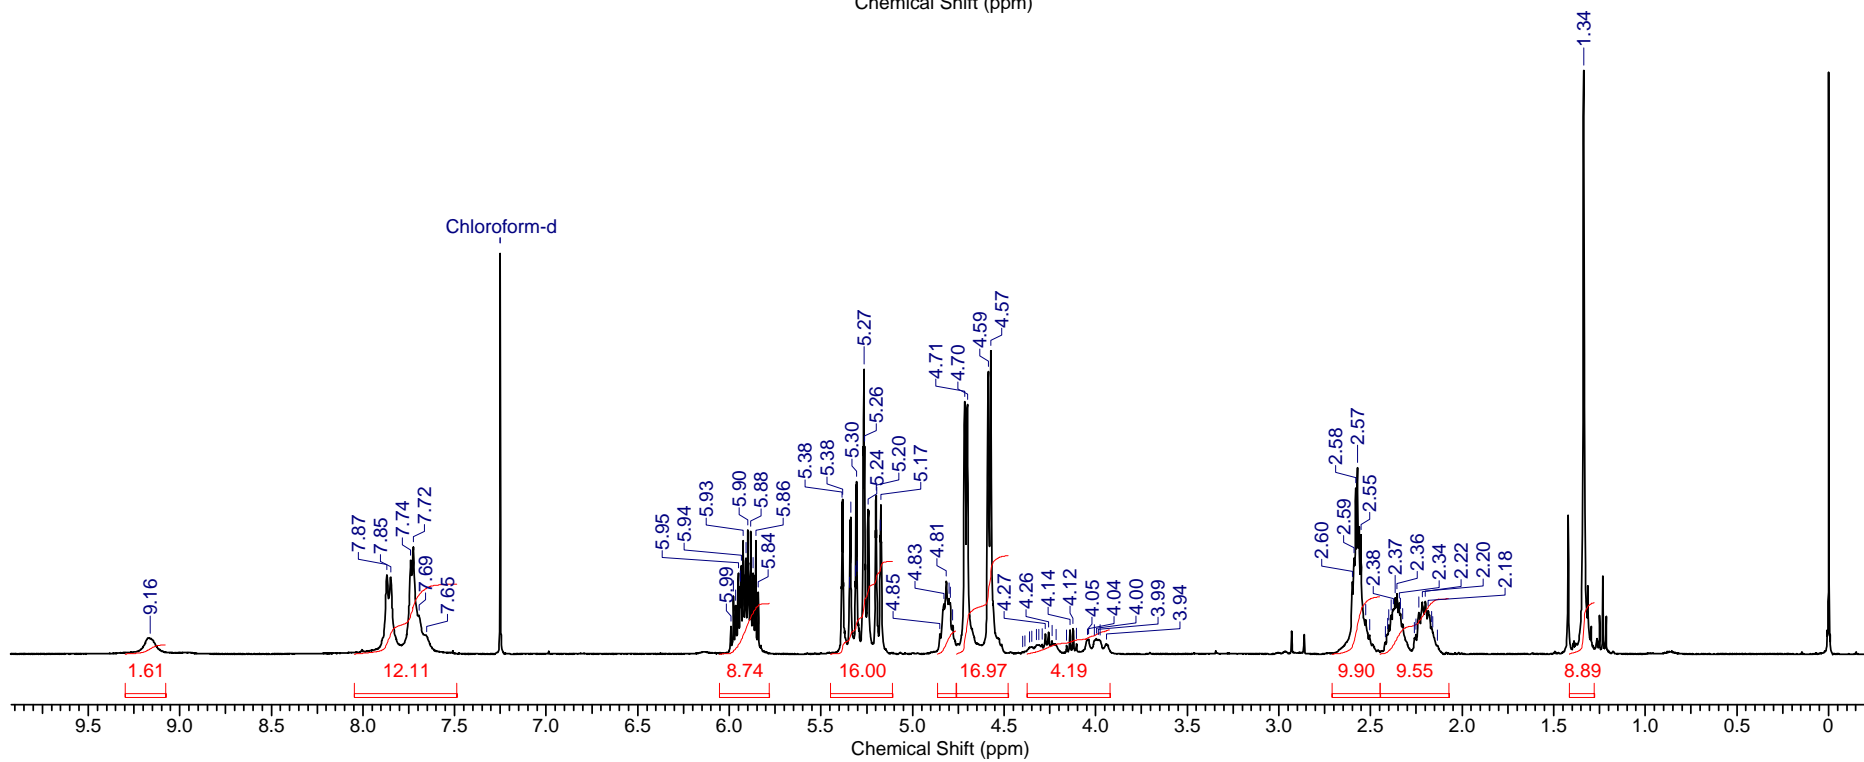

#### 4: $^1\text{H}$ NMR

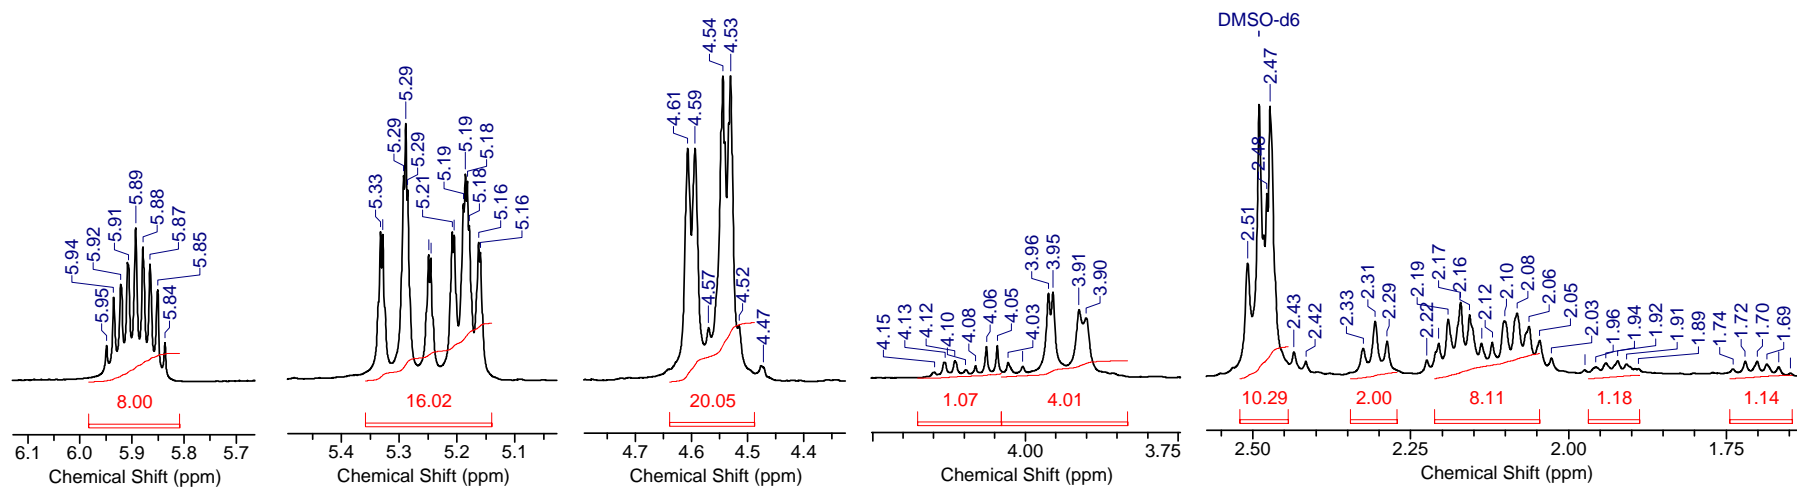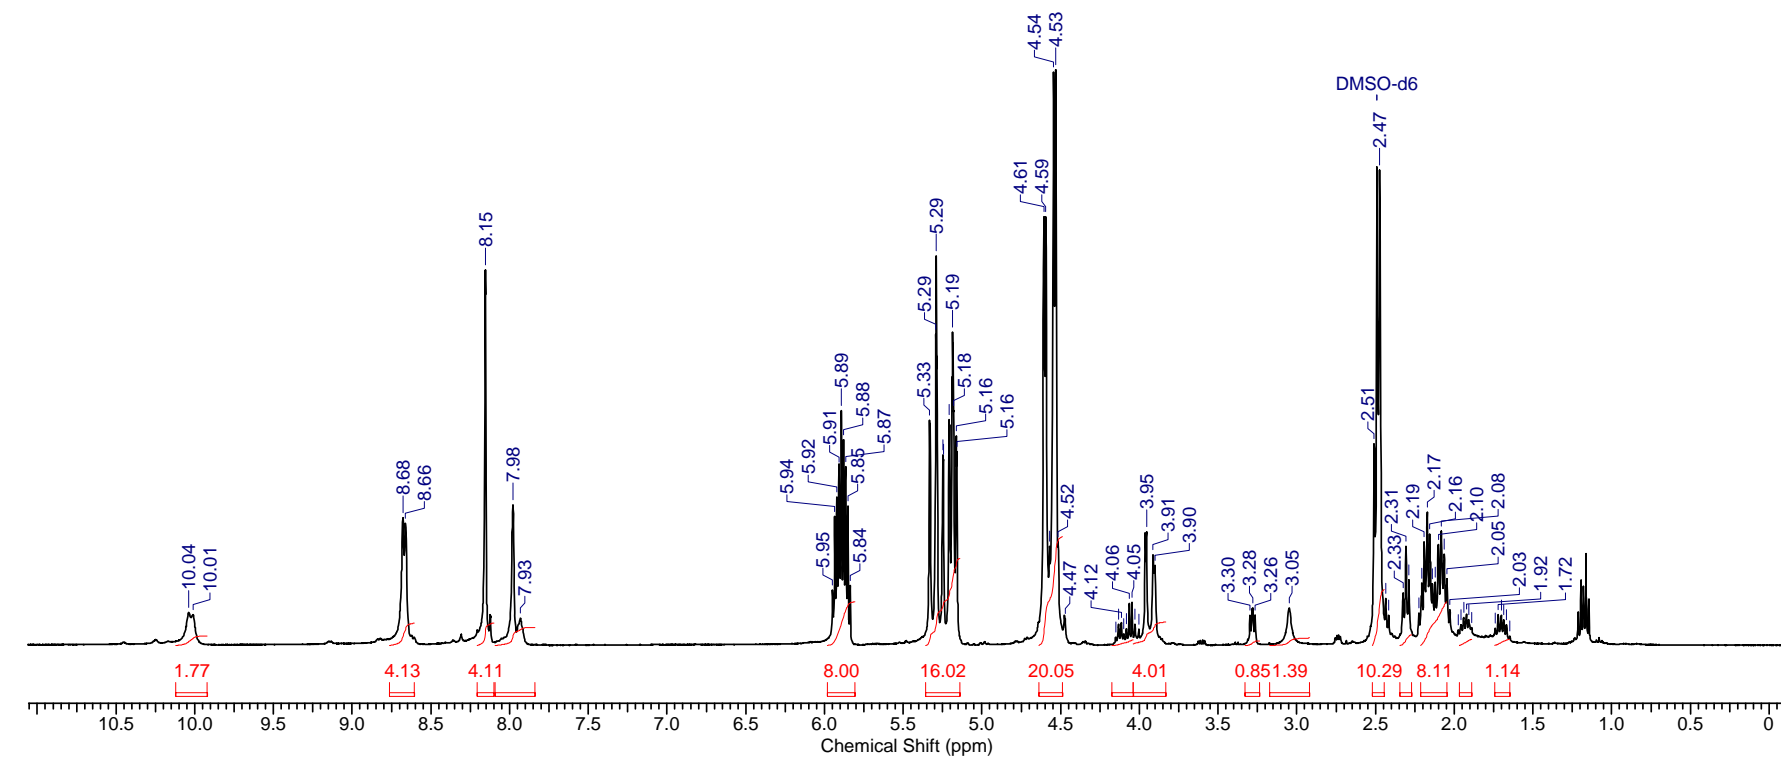

#### 4: $^{13}\text{C}$ NMR

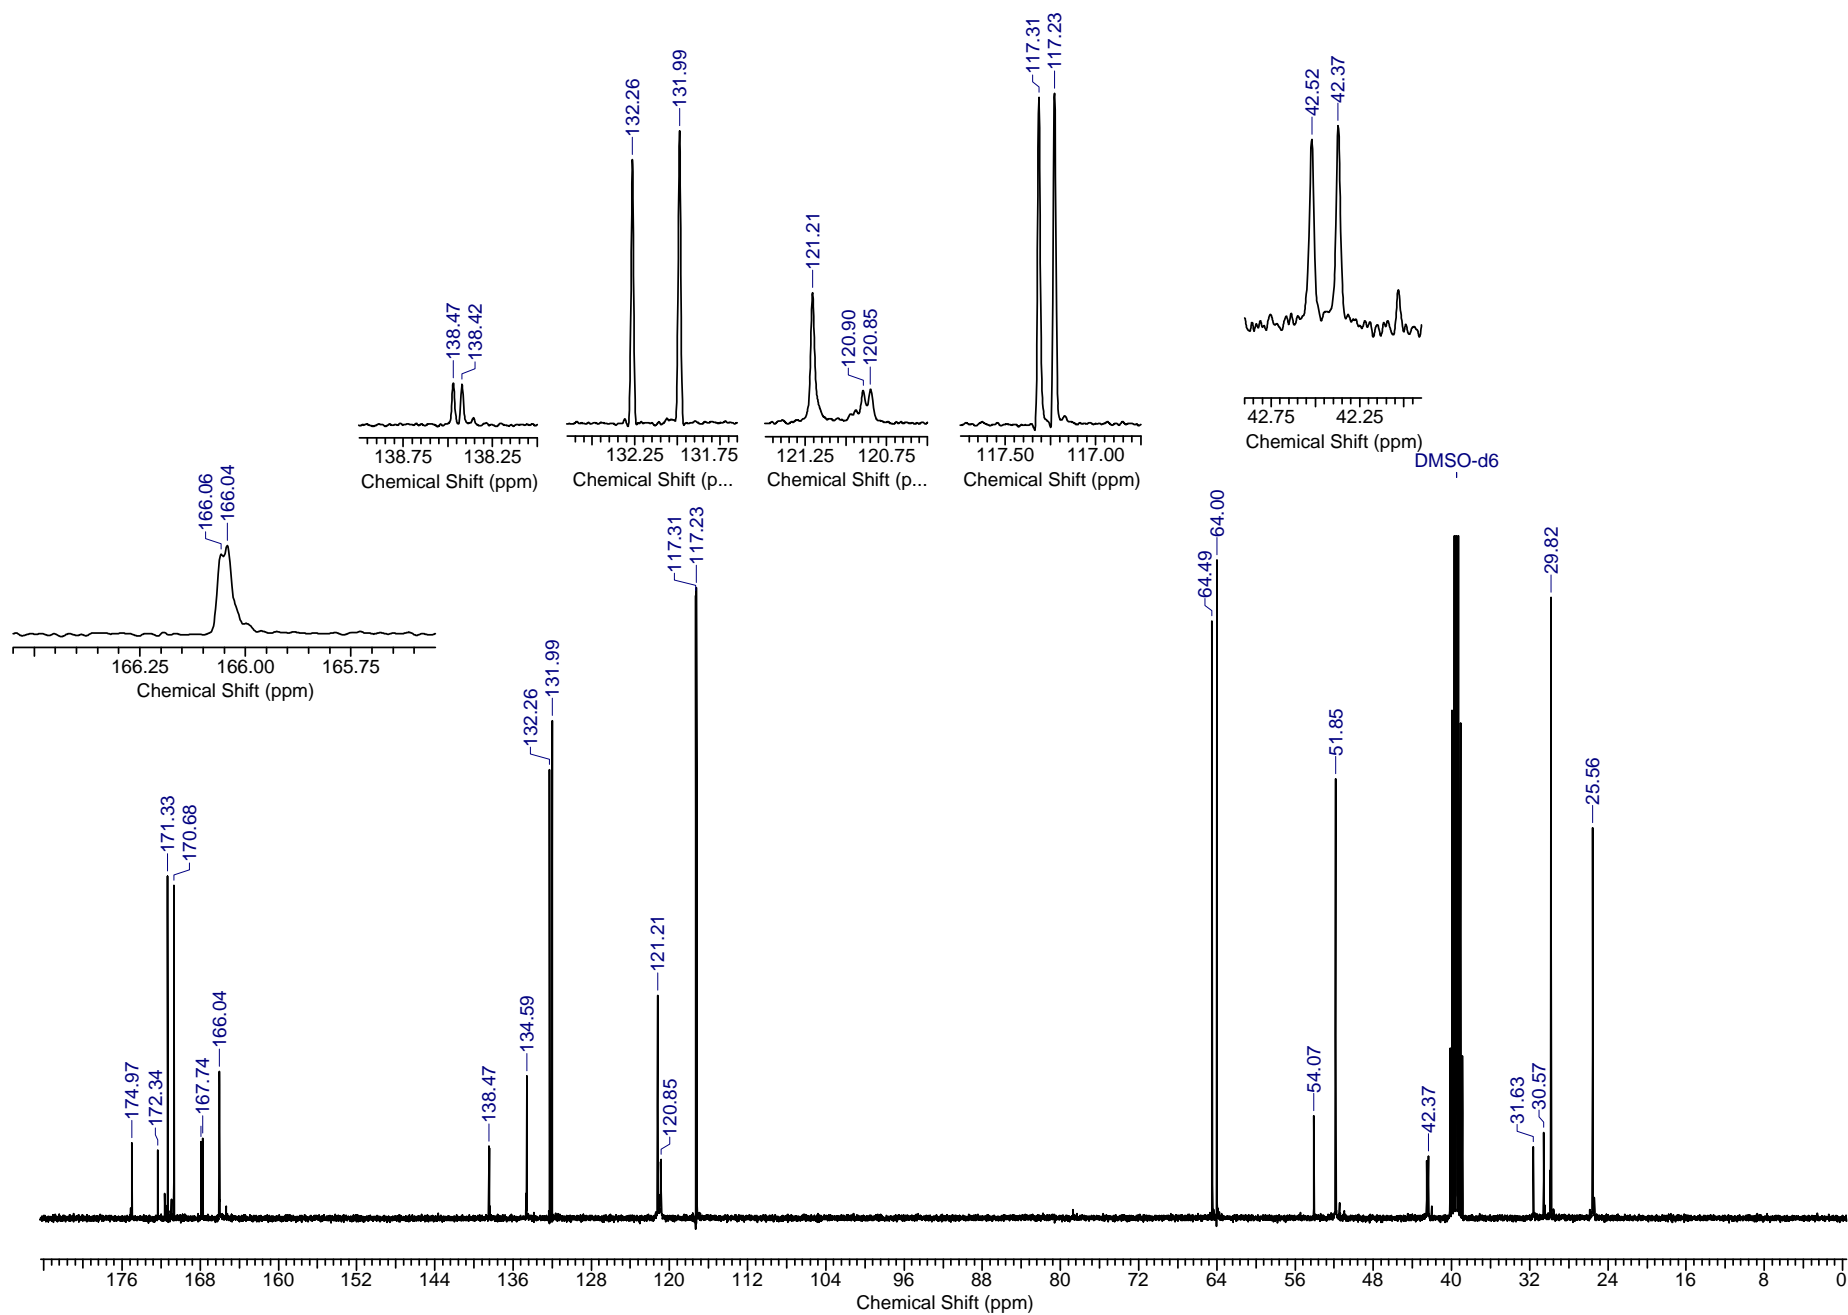

## 5: MALDI-TOF

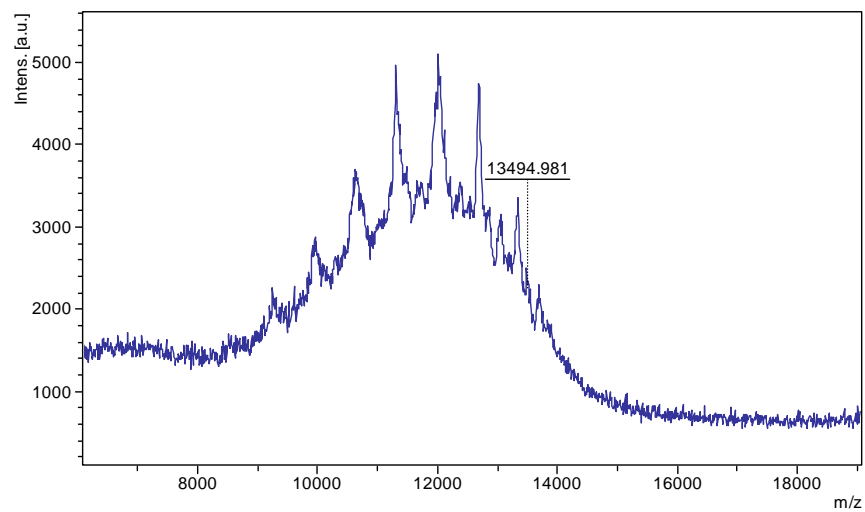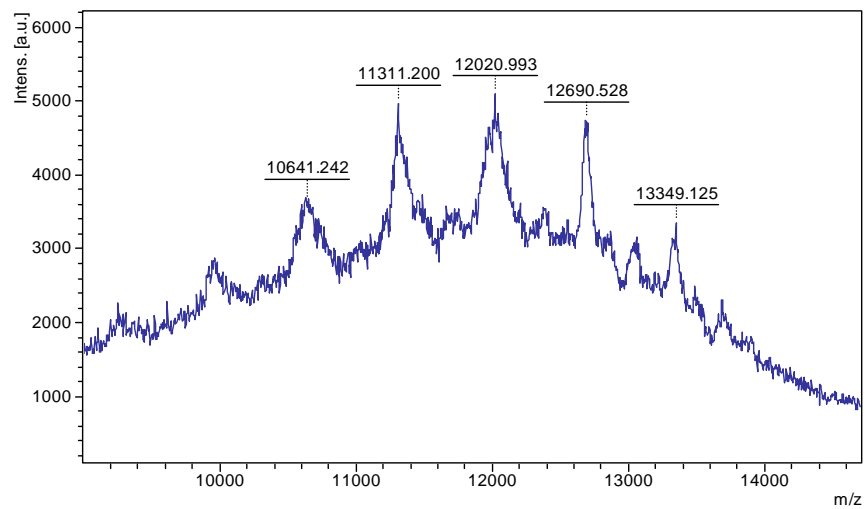



5:  $^1\text{H}$  NMR

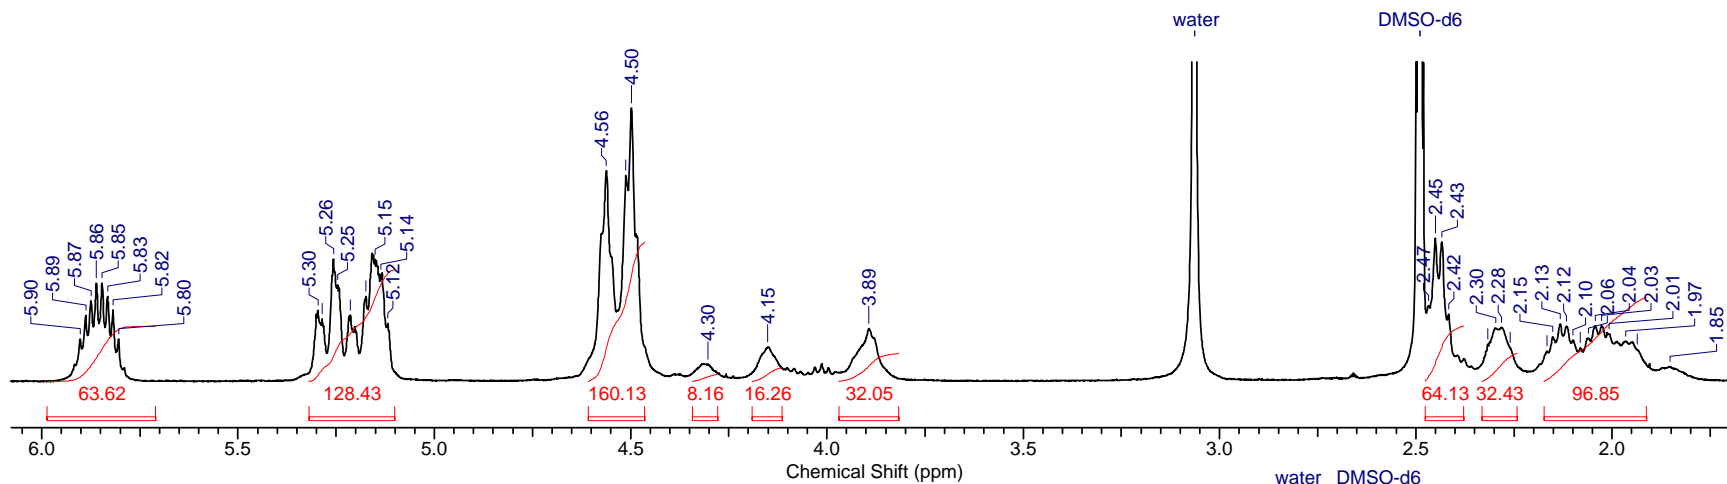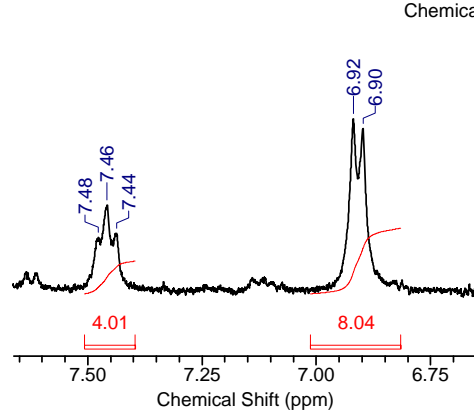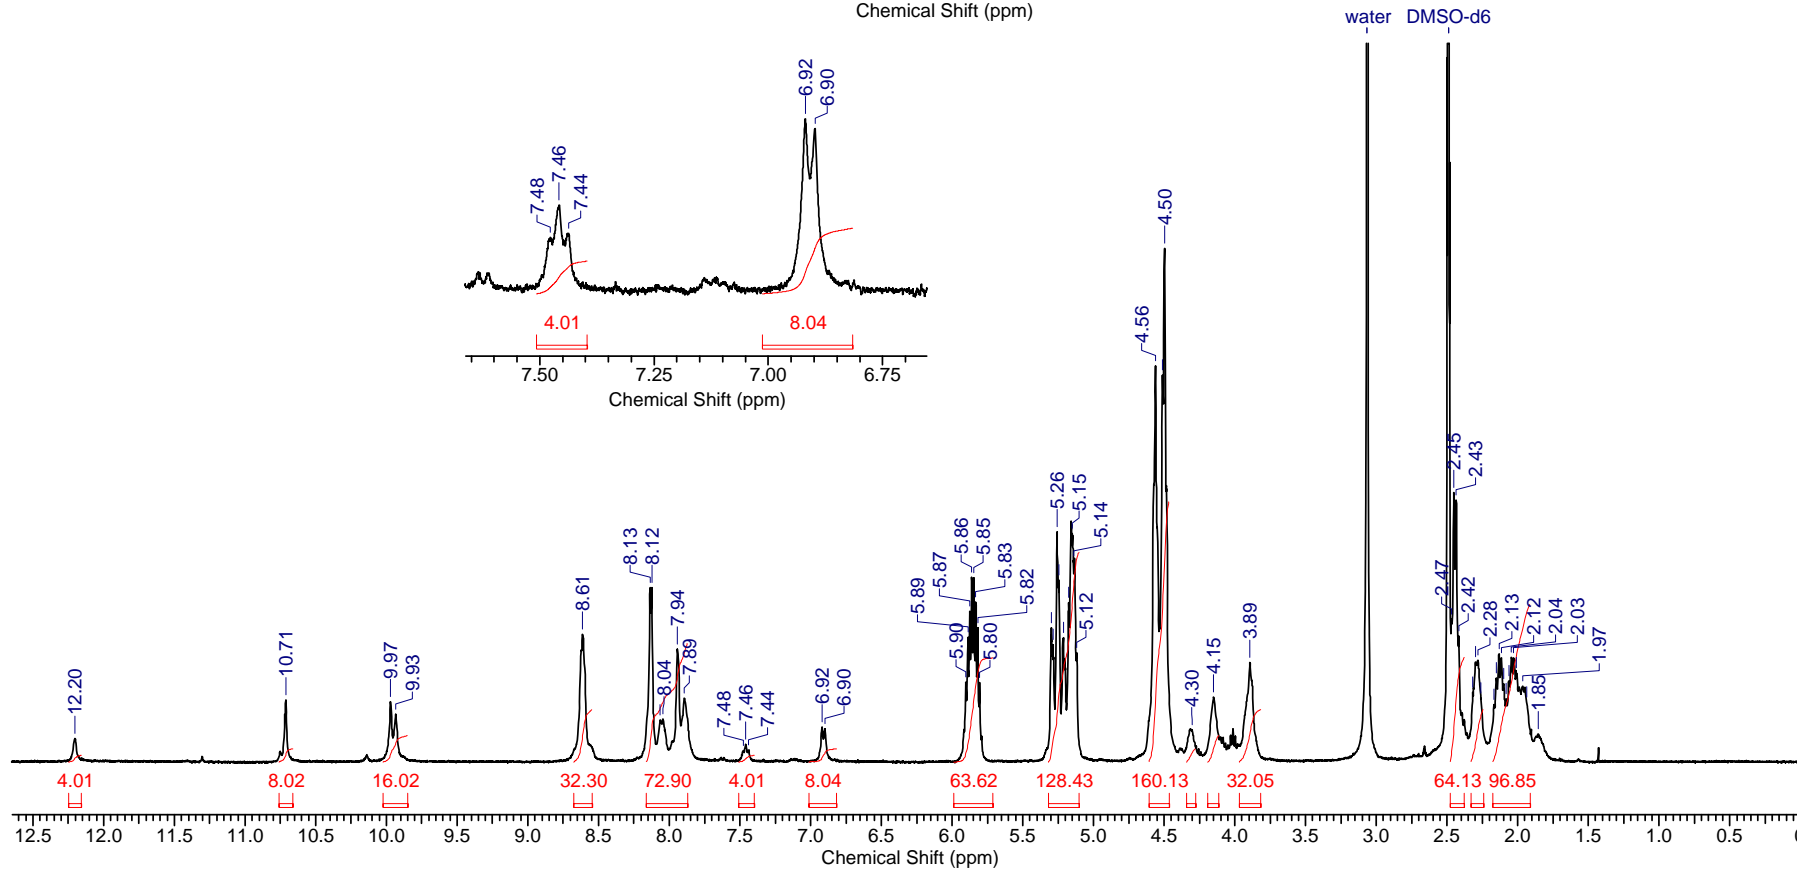

6: MALDI-TOF

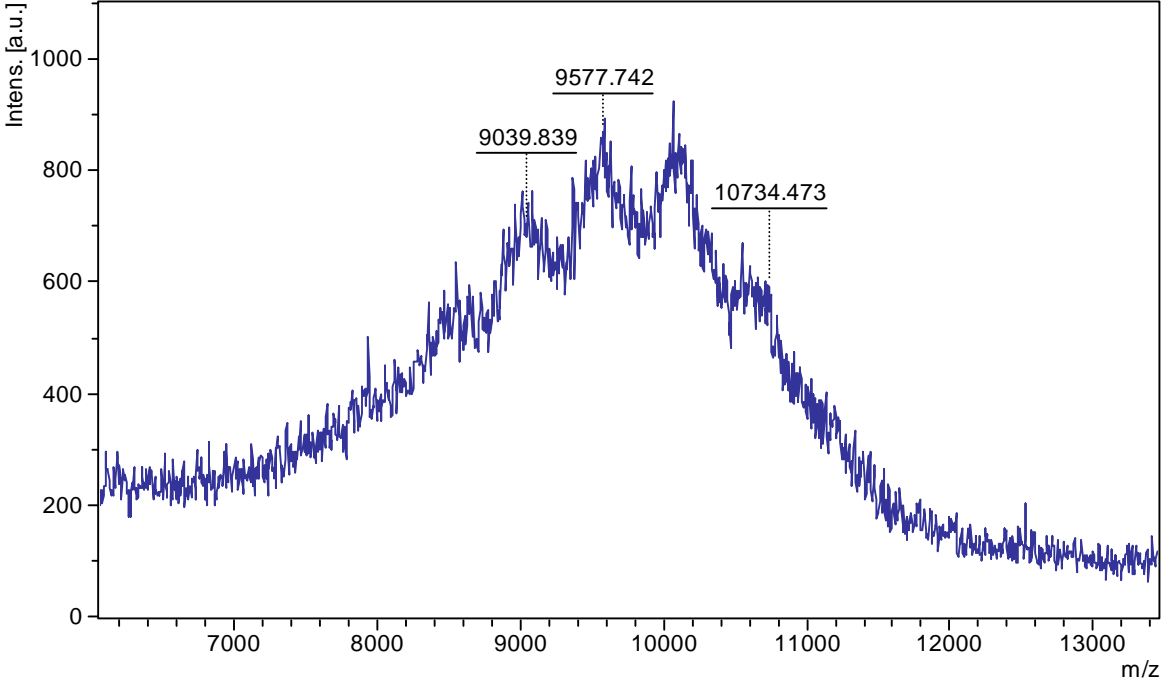

Oxyphor 2P: MALDI-TOF

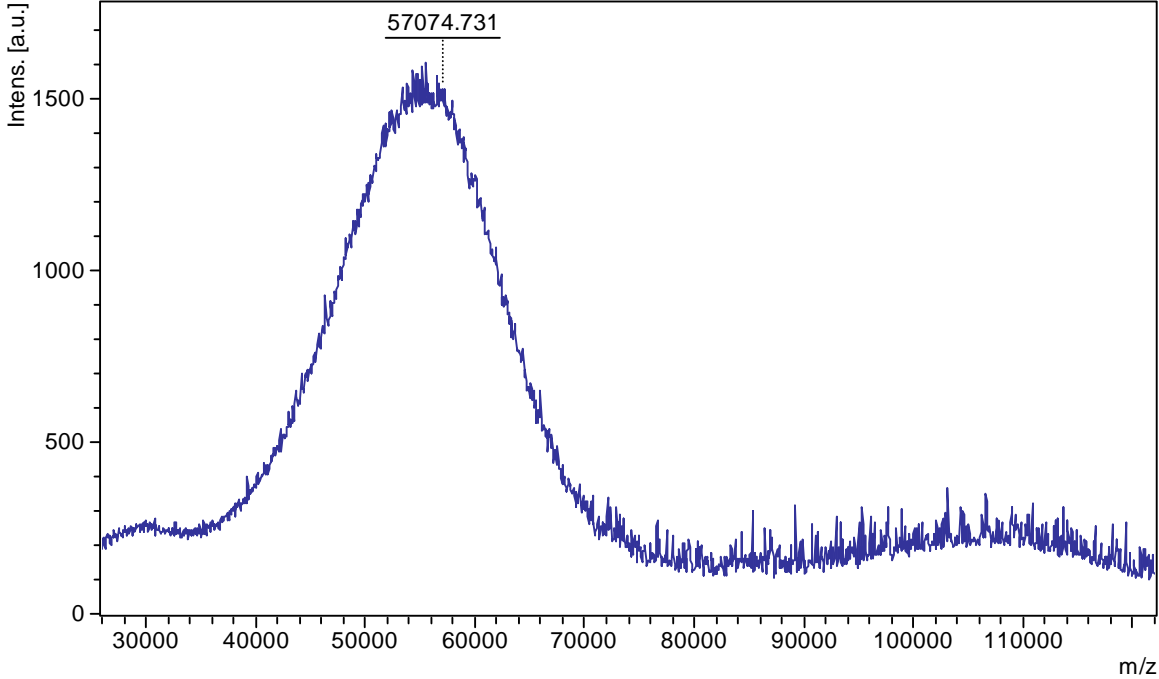

Supplement: NIHMS1517655-supplement-1.pdf [file NIHMS1517655-supplement-1.pdf]
